# Supplementary material for: Engineering flexible carbon nanofiber concatenated MOF-derived hollow octahedral CoFe2O4 as an anode material for enhanced lithium storage
Source: Royal Society of Chemistry journal article supplement (doi:10.1039/d1qi00414j), 2021-01-01
Supplement: d1qi00414j1.pdf [file d1qi00414j1.pdf]

## Supporting Information

### **Engineering flexible carbon nanofibers concatenated MOFs-derived hollow octahedral $\text{CoFe}_2\text{O}_4$ as anode materials for enhanced lithium storage**

Fangfang Xue,<sup>a</sup> Yangyang Li,<sup>a</sup> Chen Liu,<sup>a</sup> Zhigang Zhang,<sup>a</sup> Jun Lin,<sup>a</sup> Junyang, Hao,<sup>a</sup> Qihong Li<sup>\*a</sup>

<sup>a</sup>*Pen-Tung Sah Institute of Micro-Nano Science and Technology, Xiamen University, Xiamen 361005, China. E-mail: liqihong@xmu.edu.cn; Fax: +86-0592-2187196; Tel: +86-0592-2187198*

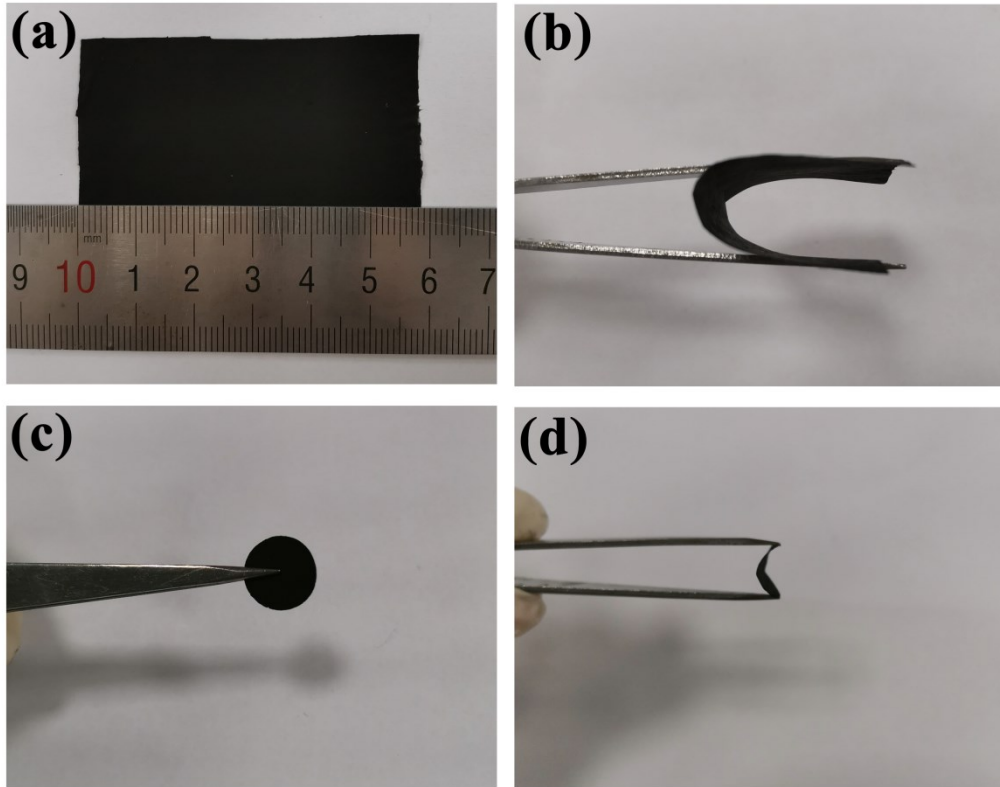

Fig. S1. Digital photographs of the CoFe<sub>2</sub>O<sub>4</sub>@CNF film and its flexible appearance.

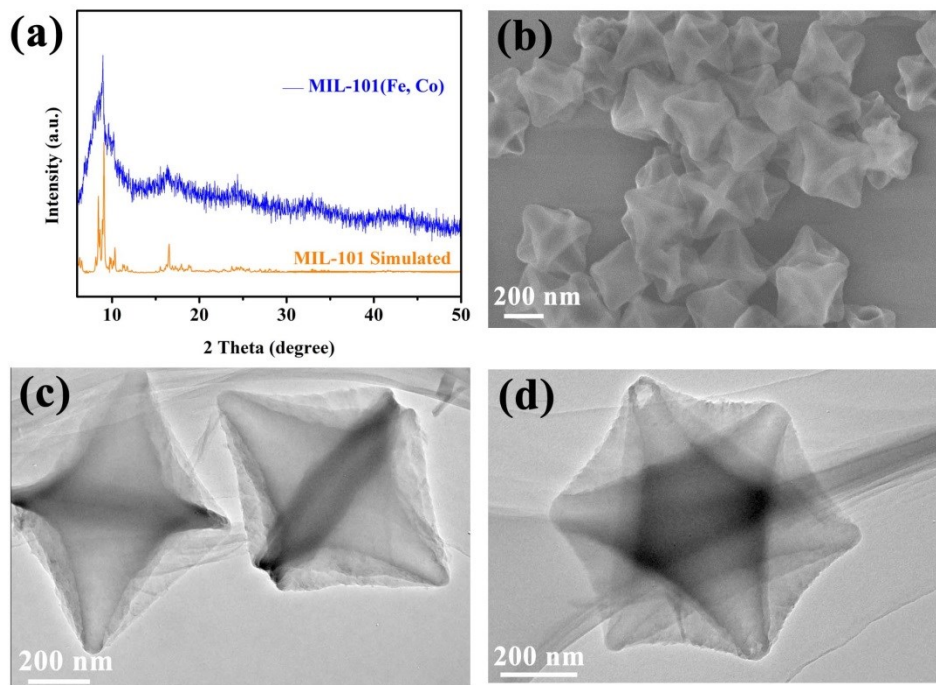

Fig. S2. (a) XRD pattern, (b) SEM image and (c,d) TEM images of MIL-101(Fe,Co).

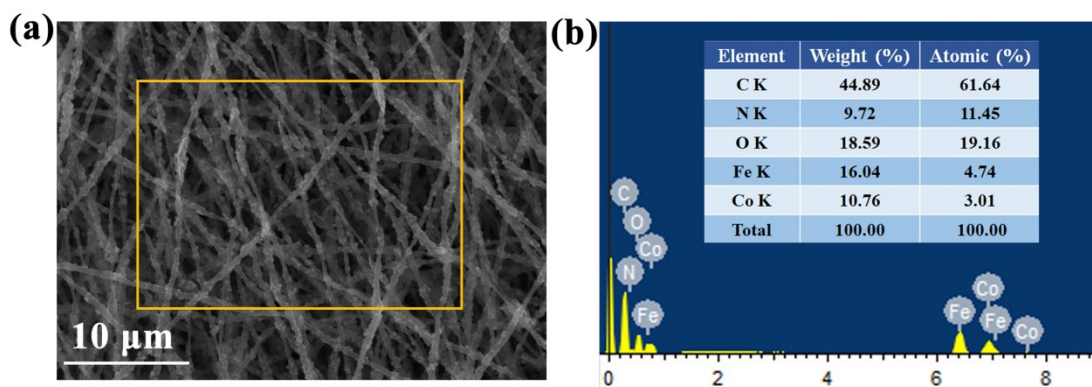

Fig. S3. (a) SEM image and selected area of CoFe<sub>2</sub>O<sub>4</sub>@CNF, (b) corresponding EDS pattern of selected area.

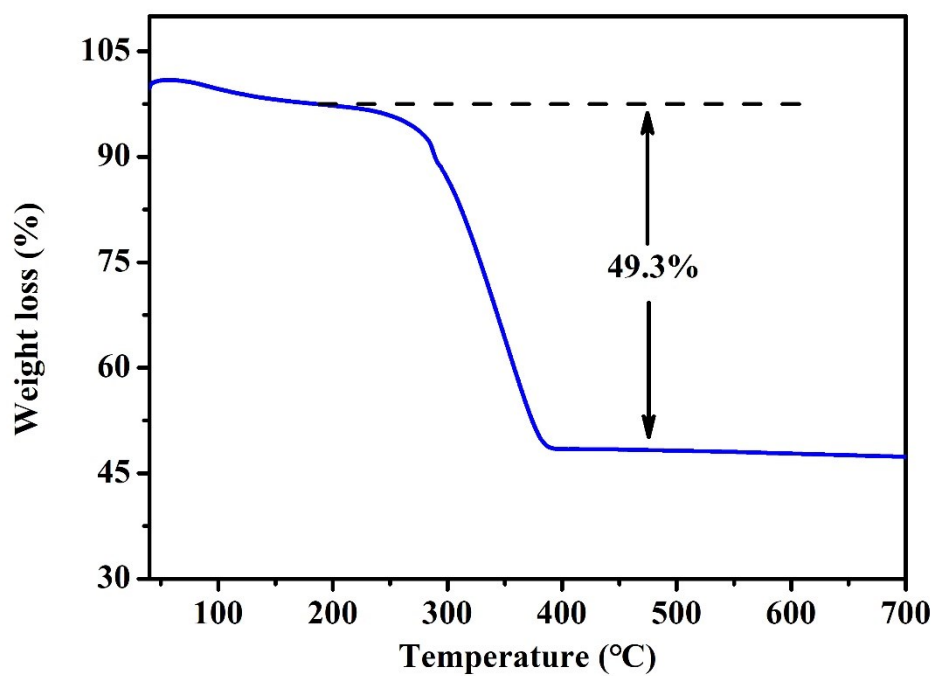

Fig. S4. TGA curve of CoFe<sub>2</sub>O<sub>4</sub>@CNF composite at a heating rate of 10 °C min<sup>-1</sup> under air flow.

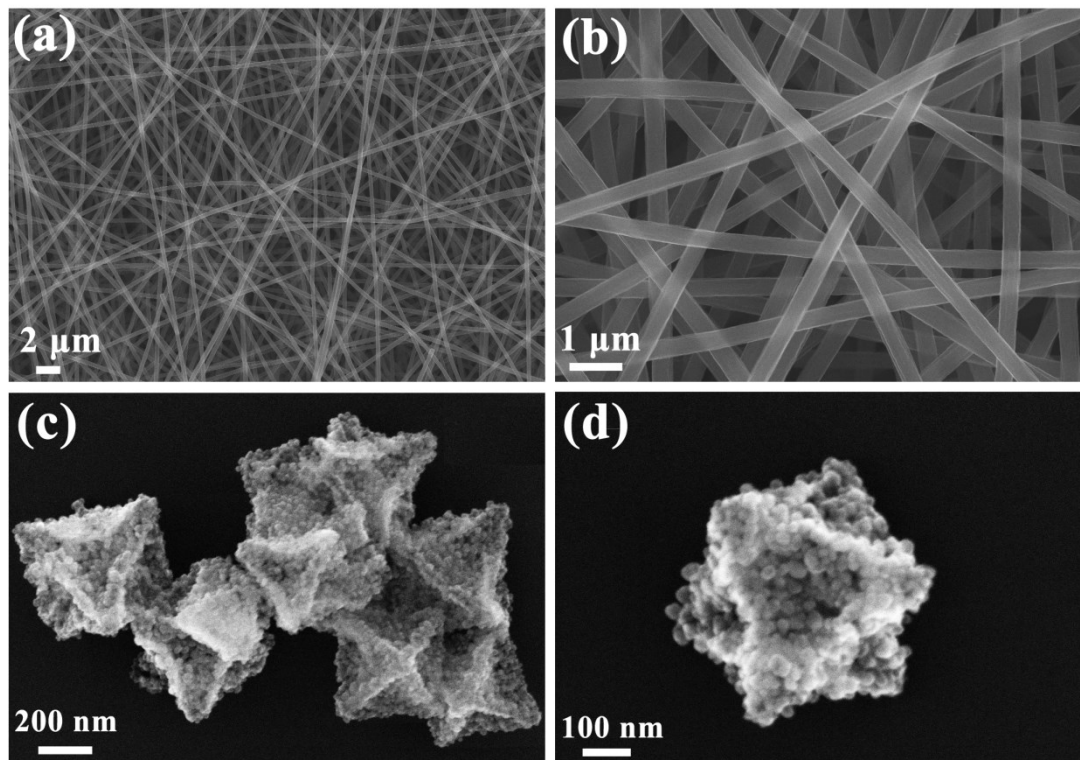

Fig. S5. SEM images of the (a, b) CNFs, (c, d)  $\text{CoFe}_2\text{O}_4$  nanoparticles.

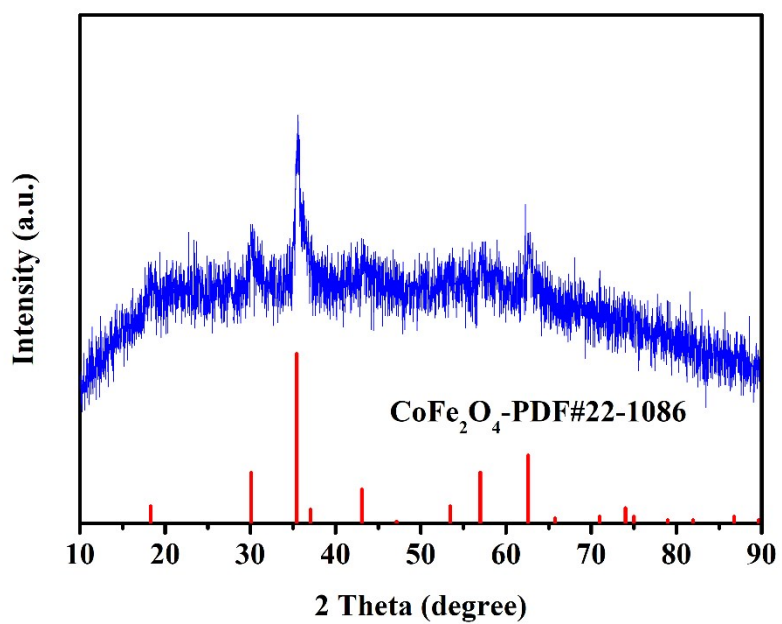

Fig.S6. XRD pattern of pure  $\text{CoFe}_2\text{O}_4$ .

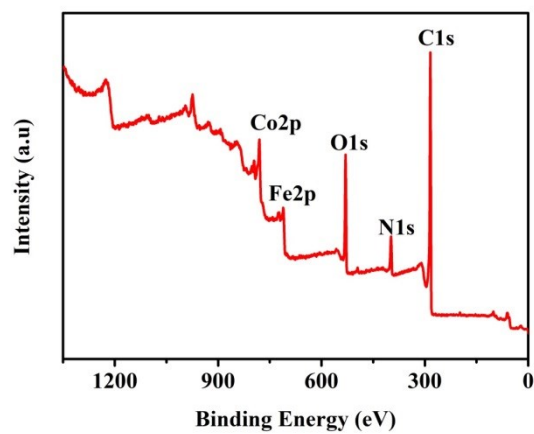

Fig.S7. XPS survey spectrum of the  $\text{CoFe}_2\text{O}_4@\text{CNF}$ .

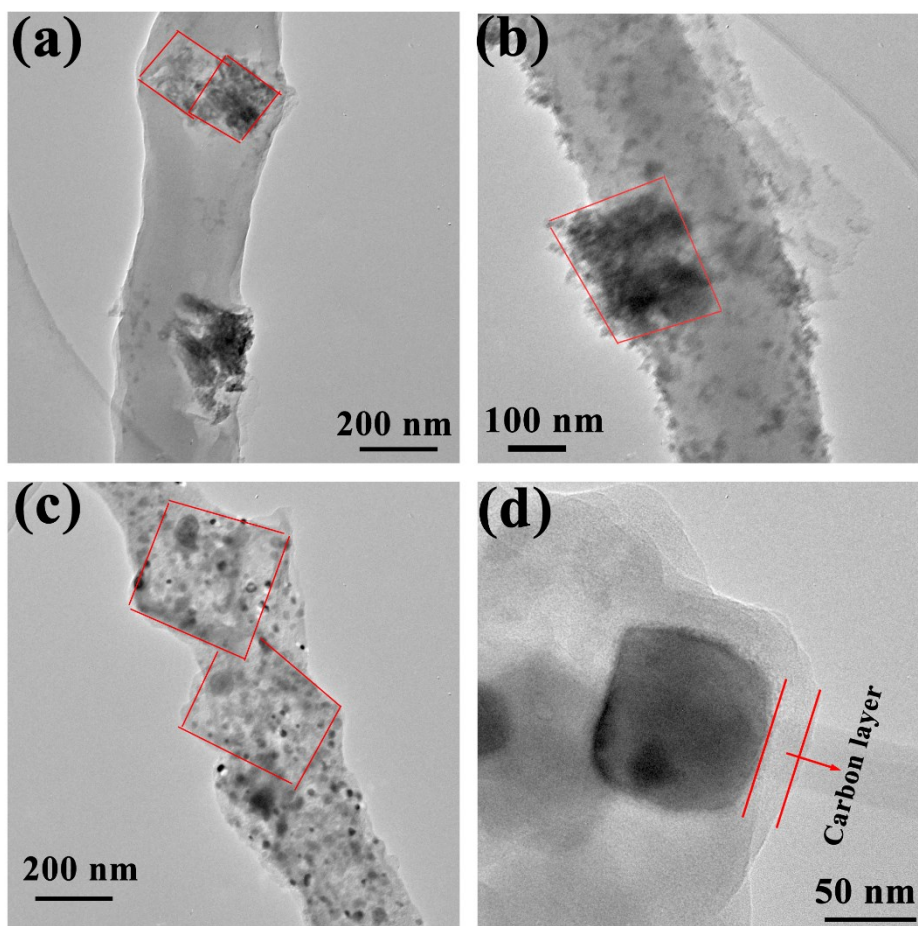

Fig. S8. TEM images of  $\text{CoFe}_2\text{O}_4@\text{CNF}$  after (a, b) 50 cycles and (c, d) 100 cycles at  $0.1 \text{ A g}^{-1}$ .

**Table S1.** Electrochemical performances of reported  $\text{CoFe}_2\text{O}_4$ -based anode for LIBs.

| Materials                                                 | Cycling Performance |        |                        | Rate performance                       |                                 | Reference        |
|-----------------------------------------------------------|---------------------|--------|------------------------|----------------------------------------|---------------------------------|------------------|
|                                                           | Capacity (mAh/g)    | Cycles | Current density (mA/g) | Capacity (mAh/g)                       | Current density (A/g)           |                  |
| $\text{CoFe}_2\text{O}_4$ @CNF                            | 1230                | 240    | 100                    | 770,706, 581,474, 371, and 216         | 0.1, 0.2, 0.5, 1, 2 and 5       | <b>This work</b> |
| $\text{CoFe}_2\text{O}_4$ NPs@C                           | 1111                | 200    | 400                    | 1271, 972, 814, 617 and 433            | 0.1, 0.2, 0.4, 0.8, and 1.2     | [1]              |
| $\text{CoFe}_2\text{O}_4$ octahedra                       | 992                 | 200    | 100                    | 845, 715, 618, 519, and 366            | 0.2, 0.5, 1, 2 and 5            | [2]              |
| $\text{CoFe}_2\text{O}_4$ nanoporous spheres              | 300                 | 1000   | 1000                   | 1057, 978, 911, 763, 484 and 270       | 0.1, 0.5, 0.8, 1, 2, and 3      | [3]              |
| $\text{CoFe}_2\text{O}_4/\text{MnO}_2/\text{C}$ nanotubes | 713.6               | 250    | 100                    | 799.8, 648.8, 470.4, and 310.6         | 0.1, 0.2, 0.5, and 1            | [4]              |
| $\text{CoFe}_2\text{O}_4$ nanoparticles                   | 1133                | 120    | 100                    | 1097, 952, 857, 843, 761 and 679       | 0.1, 0.2, 0.4, 0.8, 1.6 and 3.2 | [5]              |
| CNTs@ $\text{CoFe}_2\text{O}_4$                           | 1077                | 100    | 100                    | 1125, 1032, 996, 963, 932, 806 and 694 | 0.2, 0.4, 0.6, 0.8, 1, 2 and 3  | [6]              |
| $\text{CoFe}_2\text{O}_4$ nanotubes                       | 831.4               | 150    | 50                     | 865.7, 693.9, 564.9, 424.5, and 214.7  | 0.1, 0.2, 0.5, 1, and 2         | [7]              |
| $\text{CoFe}_2\text{O}_4$ nanofiber                       | 942                 | 80     | 100                    | 888, 730, 590, 468, and 330            | 0.3, 0.5, 1, 2 and 5            | [8]              |
| $\text{CoFe}_2\text{O}_4/\text{graphene}$                 | 925.6               | 50     | 100                    | 772.3, 430.6 and 305.3                 | 200, 800 and 1600               | [9]              |

**Table S2.** The data of CoFe<sub>2</sub>O<sub>4</sub>@CNF based on the equivalent circuit.

| <b>sample</b> | <b>Rs(<math>\Omega</math>)</b> | <b>Rct(<math>\Omega</math>)</b> | <b>Rf(<math>\Omega</math>)</b> |
|---------------|--------------------------------|---------------------------------|--------------------------------|
| 1st cycle     | 3.553                          | 364.0                           | 117.4                          |
| 5th cycle     | 4.436                          | 281.2                           | 88.26                          |
| 20th cycle    | 2.062                          | 81.9                            | 62.93                          |
| 100th cycle   | 2.861                          | 72.4                            | 14.51                          |

## References

- 1 J. Liu, J. Liang, H. Zhou, C. Xiao, F. Liang, S. Ding, CoFe<sub>2</sub>O<sub>4</sub> nanoparticles anchored on bowl-like carbon backbone for enhanced reversible lithium storage, *RSC Adv.*, 2016, **6**, 50153–50157.
- 2 J. Guo, X. Zhang, Y. Sun, X. Zhang, Mesoporous CoFe<sub>2</sub>O<sub>4</sub> octahedra with high capacity and long-life lithium storage properties, *RSC Adv.*, 2016, **6**, 18–22.
- 3 D. Li, G. Li, H. Ge, J. Zhang, X. Meng, Fabrication of CoFe<sub>2</sub>O<sub>4</sub> and NiFe<sub>2</sub>O<sub>4</sub> nanoporous spheres as promising anodes for high performance lithium-ion batteries, *New J. Chem.*, 2017, **41**, 15501–15507.
- 4 J. Zhou, T. Yang, M. Mao, W. R. Q. Li, Enhanced electrochemical performance of hierarchical CoFe<sub>2</sub>O<sub>4</sub>/MnO<sub>2</sub>/C nanotubes as anode materials for lithium-ion batteries, *J. Mater. Chem. A*, 2015, **3**, 12328.
- 5 J. Mao, X. Hou, X. Wang, S. Hu, L. Xiang, The cubic aggregated CoFe<sub>2</sub>O<sub>4</sub> nanoparticle anode material for lithium ion battery with good performance *Mater. Lett.*, 2015, **161**, 652–655.
- 6 L. Wang, L. Zhuo, H. Cheng, C. Zhang, F. Zhao, Porous carbon nanotubes decorated with nanosized cobalt ferrite as anode materials for high-performance lithium-ion batteries, *J. Power Sources*, 2015, **283**, 289–299.
- 7 H. Wang, D. Liu, Y. Li, Q. Duan, Single-spinneret electrospinning fabrication of CoFe<sub>2</sub>O<sub>4</sub> nanotubes as high-performance anode materials for lithium-ion batteries, *Mater. Lett.*, 2016, **172**, 64–67.
- 8 H. Qiao, Y. Yu, R. Li, X. Xue, Q. Wei, Facile synthesis of one-dimensional mesoporous cobalt ferrite nanofibers for high lithium storage anode material, *Ionics*, 2019, **25**, 125–132.
- 9 M. Zhang, X. Yang, X. Kan, X. Wang, L. Ma, M. Jia, Carbon-encapsulated CoFe<sub>2</sub>O<sub>4</sub> /graphene nanocomposite as high performance anode for lithium ion batteries, *Electrochim. Acta*, 2013, **112**, 727–734.
